# Supplementary material for: Environmental and societal costs of maize production decrease by addressing the uncertainty in nitrogen rate recommendations
Source: Research Square preprint supplement (doi:10.21203/rs.3.rs-6735572/v1), 2025-06-24
Supplement: Supplementary file 1 [file 8c11121b1b48ee599077aa2b.pdf]

## Note S1

We conducted a literature review to retrieve information about  $\text{N}_2\text{O}$  emissions and  $\text{NO}_3^-$  leaching in the U.S. Corn Belt. The search was conducted through Web of Science®. The 31 of June 2024 was selected as a cut-off date, after which literature searches were no longer conducted. The implemented keywords were: “fertilizer”, “nitrogen” OR “N”, “agriculture”, “nitrous oxide”, “emissions”, “nitrate”, and “leaching”. The selection criteria were: (i) the experiment was conducted in the studied states within the United States of America (Iowa, Illinois, Indiana, Minnesota, Missouri, North Dakota, Nebraska, and Wisconsin); (ii) the experiments were performed in field conditions; (iii) only corn-based systems were considered; (iv) the implemented N rates were between  $50 \text{ kg N ha}^{-1}$  and  $300 \text{ kg N ha}^{-1}$  because  $\text{N}_2\text{O}$  emissions and  $\text{NO}_3^-$  leaching were calculated at the E[AONR], E[EONR], and the 0.3 quantile of the EONR; and (v) manure were not included because of uncertainty and variability in nutrient composition. Out of the retrieved articles, a total of 31 studies were considered to summarize  $\text{N}_2\text{O}$  emissions and  $\text{NO}_3^-$  leaching in the U.S. Corn Belt (**Table S3**).

## Supplementary Tables

**Table S1.** Prior probability distributions of the parameters in the quadratic plateau models fitted to the relationship between grain yield and nitrogen rates. Inside the parenthesis for the hyperparameters column, the left and the right numbers indicate the shape and the rate of the distribution, respectively.

| State     | Parameter            | Probability Distribution | Hyperparameters |
|-----------|----------------------|--------------------------|-----------------|
| Iowa      | $\beta_0$            | gamma                    | (10.89, 0.0015) |
|           | $\beta_1$            |                          | (3.26, 0.0467)  |
|           | $\beta_2$            |                          | (1.5, 10.00)    |
|           | $\sigma_\varepsilon$ |                          | (3.75, 0.0025)  |
| Illinois  | $\beta_0$            | gamma                    | (9.389, 0.0014) |
|           | $\beta_1$            |                          | (2.82, 0.043)   |
|           | $\beta_2$            |                          | (0.96, 8.00)    |
|           | $\sigma_\varepsilon$ |                          | (3.75, 0.0025)  |
| Indiana   | $\beta_0$            | gamma                    | (10.43, 0.0015) |
|           | $\beta_1$            |                          | (2.64, 0.039)   |
|           | $\beta_2$            |                          | (1.22, 8.75)    |
|           | $\sigma_\varepsilon$ |                          | (3.75, 0.0025)  |
| Minnesota | $\beta_0$            | gamma                    | (9.041, 0.0015) |
|           | $\beta_1$            |                          | (2.16, 0.045)   |
|           | $\beta_2$            |                          | (1.025, 11.39)  |
|           | $\sigma_\varepsilon$ |                          | (6.51, 0.0042)  |
| Missouri  | $\beta_0$            | gamma                    | (13.68, 0.0021) |
|           | $\beta_1$            |                          | (1.98, 0.0415)  |
|           | $\beta_2$            |                          | (1.20, 7.083)   |
|           | $\sigma_\varepsilon$ |                          | (8.026, 0.0044) |

21 **Table S1** (continued).

| State        | Parameter            | Probability<br>Distribution | Hyperparameters  |
|--------------|----------------------|-----------------------------|------------------|
| North Dakota | $\beta_0$            | gamma                       | (13.26, 0.0018)  |
|              | $\beta_1$            |                             | (0.914, 0.0307)  |
|              | $\beta_2$            |                             | (0.916, 8.33)    |
|              | $\sigma_\varepsilon$ |                             | (9.17, 0.0042)   |
| Nebraska     | $\beta_0$            | gamma                       | (20.28, 0.00205) |
|              | $\beta_1$            |                             | (1.838, 0.0416)  |
|              | $\beta_2$            |                             | (0.89, 8.14)     |
|              | $\sigma_\varepsilon$ |                             | (8.105, 0.0043)  |
| Wisconsin    | $\beta_0$            | gamma                       | (20.17, 0.00217) |
|              | $\beta_1$            |                             | (1.703, 0.0382)  |
|              | $\beta_2$            |                             | (1.071, 7.1428)  |
|              | $\sigma_\varepsilon$ |                             | (5.266, 0.00315) |

22

23

24 **Table S2.** Reason justifying why the sites in this table were not included to analyze nitrogen  
 25 reductions. AONR stands for the agronomic optimum nitrogen rate,  $E[AONR]$  is the expected  
 26 value of the AONR. N rate represents the nitrogen fertilization rate applied to maize crop at  
 27 planting. EONR represents the economic optimum nitrogen rate.  $\hat{R}$  ("R hat") indicates the Gelman-  
 28 Rubin diagnostic. The column site indicates the number of the experiment in the original dataset.

| State        | Site | Reason                                                         |
|--------------|------|----------------------------------------------------------------|
| Illinois     | T3   | $E[AONR] > \max(N \text{ rate})$                               |
| Minnesota    | T39  | $E[AONR] > \max(N \text{ rate})$                               |
| Missouri     | T25  | $E[AONR] > \max(N \text{ rate})$ and $\hat{R} > 1.02$ for EONR |
| Missouri     | T26  | $E[AONR] > \max(N \text{ rate})$ and $\hat{R} > 1.02$ for EONR |
| North Dakota | T12  | $E[AONR] > \max(N \text{ rate})$ and $\hat{R} > 1.02$ for EONR |
| North Dakota | T27  | $\hat{R} > 1.02$ for EONR                                      |
| North Dakota | T28  | $\hat{R} > 1.02$ for EONR                                      |
| North Dakota | T44  | $\hat{R} > 1.02$ for AONR and EONR                             |
| North Dakota | T45  | $\hat{R} > 1.02$ for AONR and EONR                             |
| Nebraska     | T13  | $E[AONR] > \max(N \text{ rate})$ and $\hat{R} > 1.02$ for EONR |
| Nebraska     | T29  | $E[AONR] > \max(N \text{ rate})$ and $\hat{R} > 1.02$ for EONR |
| Nebraska     | T30  | $\hat{R} > 1.02$ for AONR and EONR                             |
| Nebraska     | T47  | $\hat{R} > 1.02$ for AONR and EONR                             |
| Wisconsin    | T31  | $\hat{R} > 1.02$ for EONR                                      |
| Wisconsin    | T32  | $E[AONR] > \max(N \text{ rate})$ and $\hat{R} > 1.02$ for EONR |
| Wisconsin    | T48  | $\hat{R} > 1.02$ for EONR                                      |
| Wisconsin    | T49  | $\hat{R} > 1.02$ for AONR and EONR                             |

29 **Table S3.** Descriptive statistics for the retrieved studies addressing N<sub>2</sub>O emissions and NO<sub>3</sub><sup>-</sup> leaching in the United States Corn Belt.  
30 The last column indicates the minimum (Min), 0.25 quantile (Q0.25), the mean, the variance, 0.75 quantile (Q0.75), and the maximum  
31 value of N<sub>2</sub>O emissions and NO<sub>3</sub><sup>-</sup> leaching across all the studies.

| Reference                                    | Number of Obs. | State | N <sub>2</sub> O – N<br>(kg ha <sup>-1</sup> ) |          | N <sub>2</sub> O – N<br>(kg ha <sup>-1</sup> ) |       |      |          |       |       |
|----------------------------------------------|----------------|-------|------------------------------------------------|----------|------------------------------------------------|-------|------|----------|-------|-------|
|                                              |                |       | Mean                                           | Variance | Min                                            | Q0.25 | Mean | Variance | Q0.75 | Max   |
| Adviento-Borbe et al. (2007) <sup>1</sup>    | 10             | NE    | 3.71                                           | 5.71     |                                                |       |      |          |       |       |
| Fujinuma et al. (2011) <sup>2</sup>          | 6              | MN    | 0.90                                           | 0.24     |                                                |       |      |          |       |       |
| Maharjan and Venterea (2013) <sup>3</sup>    | 3              | MN    | 2.43                                           | 0.82     |                                                |       |      |          |       |       |
| Maharjan et al. (2014) <sup>4</sup>          | 3              | MN    | 0.34                                           | 0.01     |                                                |       |      |          |       |       |
| Parkin and Hatfield (2010) <sup>5</sup>      | 2              | IA    | 6.14                                           | 1.57     |                                                |       |      |          |       |       |
| Phillips et al. (2009) <sup>6</sup>          | 2              | ND    | 0.48                                           | 0.01     |                                                |       |      |          |       |       |
| Smith et al. (2011) <sup>7</sup>             | 8              | IN    | 2.82                                           | 0.22     |                                                |       |      |          |       |       |
| Venterea et al. (2010) <sup>8</sup>          | 12             | MN    | 1.59                                           | 0.65     | 0.28                                           | 1.29  | 3.93 | 11.65    | 5.37  | 16.26 |
| Hernandez-Ramirez et al. (2009) <sup>9</sup> | 4              | IN    | 5.65                                           | 1.08     |                                                |       |      |          |       |       |
| Johnson et al. (2010) <sup>10</sup>          | 9              | MN    | 5.29                                           | 0.77     |                                                |       |      |          |       |       |
| Mitchell et al. (2013) <sup>11</sup>         | 4              | IA    | 4.49                                           | 1.00     |                                                |       |      |          |       |       |
| Omonode and Vyn (2013) <sup>12</sup>         | 8              | IN    | 4.09                                           | 29.47    |                                                |       |      |          |       |       |
| Johnson II et al. (2024) <sup>13</sup>       | 2              | IA    | 1.01                                           | 0.12     |                                                |       |      |          |       |       |
| Preza-Fontes et al. (2023) <sup>14</sup>     | 9              | IL    | 10.40                                          | 3.29     |                                                |       |      |          |       |       |

32

33

34 **Table S3** (continued).

35

| Reference                                 | Number<br>of Obs. | State | NO <sub>3</sub> <sup>-</sup> – N<br>(kg ha <sup>-1</sup> ) |          | NO <sub>3</sub> <sup>-</sup> – N<br>(kg ha <sup>-1</sup> ) |       |      |          |       |       |
|-------------------------------------------|-------------------|-------|------------------------------------------------------------|----------|------------------------------------------------------------|-------|------|----------|-------|-------|
|                                           |                   |       | Mean                                                       | Variance | Min                                                        | Q0.25 | Mean | Variance | Q0.75 | Max   |
| Bakhsh et al. (2007) <sup>15</sup>        | 5                 | IA    | 10.1                                                       | 48       |                                                            |       |      |          |       |       |
| Bakhsh et al. (2010) <sup>16</sup>        | 10                | IA    | 11.4                                                       | 55       |                                                            |       |      |          |       |       |
| Helmers et al. (2012) <sup>17</sup>       | 28                | IA    | 46.7                                                       | 403      |                                                            |       |      |          |       |       |
| Jaynes (2013) <sup>18</sup>               | 6                 | IA    | 32.3                                                       | 127      |                                                            |       |      |          |       |       |
| Jaynes et al. (2001) <sup>19</sup>        | 6                 | IA    | 47.5                                                       | 107      |                                                            |       |      |          |       |       |
| Kucharik and Brye (2003) <sup>20</sup>    | 10                | WI    | 56.1                                                       | 3161     |                                                            |       |      |          |       |       |
| Maharjan et al. (2014) <sup>4</sup>       | 3                 | MN    | 25.8                                                       | 19       |                                                            |       |      |          |       |       |
| Prunty and Greenland (1997) <sup>21</sup> | 4                 | ND    | 47.2                                                       | 2822     |                                                            |       |      |          |       |       |
| Randall et al. (2003) <sup>22</sup>       | 24                | MN    | 36.0                                                       | 1209     | 0.02                                                       | 14.0  | 34.8 | 1005     | 47.7  | 201.1 |
| Randall and Vetsch (2005) <sup>23</sup>   | 24                | MN    | 17.4                                                       | 256      |                                                            |       |      |          |       |       |
| Sexton et al. (1996) <sup>24</sup>        | 12                | MN    | 60.0                                                       | 1831     |                                                            |       |      |          |       |       |
| Walters and Malzer (1990) <sup>25</sup>   | 24                | MN    | 49.2                                                       | 1726     |                                                            |       |      |          |       |       |
| Kalita et al. (2006) <sup>26</sup>        | 21                | IL    | 24.8                                                       | 330      |                                                            |       |      |          |       |       |
| O'Brien et al. (2022) <sup>27</sup>       | 10                | IA    | 14.8                                                       | 149      |                                                            |       |      |          |       |       |
| Preza-Fontes et al. (2023) <sup>14</sup>  | 3                 | IL    | 21.9                                                       | 24       |                                                            |       |      |          |       |       |
| Johnson II et al. (2024) <sup>13</sup>    | 2                 | IA    | 26.1                                                       | 283      |                                                            |       |      |          |       |       |
| Gentry et al. (2023) <sup>28</sup>        | 6                 | IL    | 27.8                                                       | 49       |                                                            |       |      |          |       |       |

Supplementary Figures

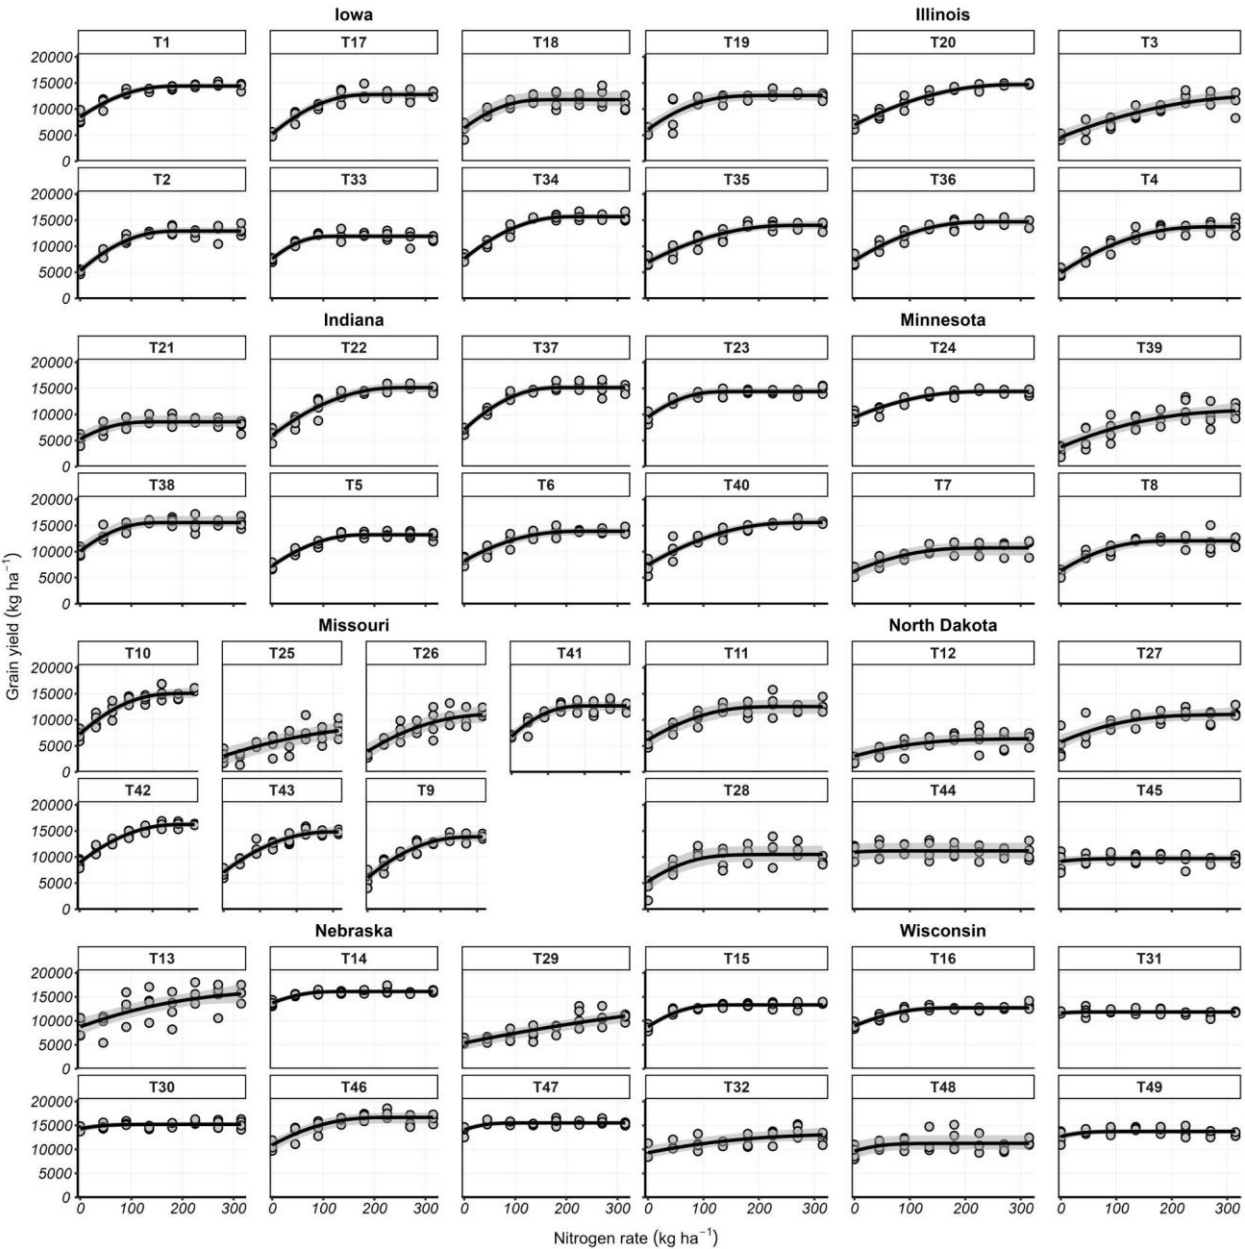

**Fig. S1.** Relationship between maize grain yield ( $y$ ) and nitrogen rate ( $x$ ) in each of the studied sites. The solid lines represent the expected grain yield at different nitrogen rates. The shadow areas indicate the 95% credible interval of the posterior predictive distributions. The label in each plot indicates the number of the trial in the original dataset.

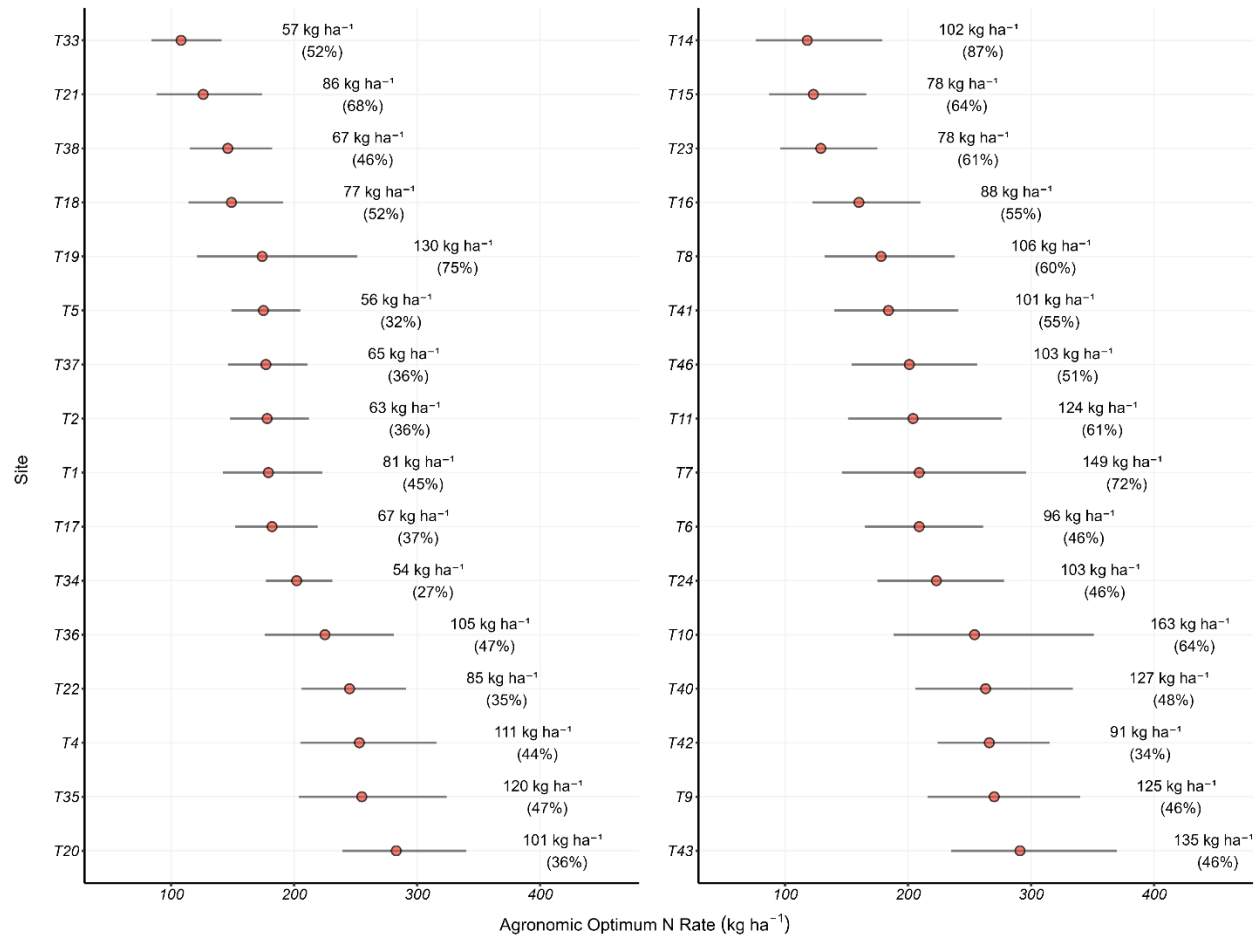

**Fig. S2.** Summary of the agronomic optimum nitrogen rate (AONR) for each of the selected sites. Circles indicate the expected value of the distribution ( $E[AONR]$ ), the horizontal bars and upper values on the right indicate the 95% credible interval of the AONR, and the lower values, between parentheses, on the right indicate the proportion of the uncertainty with respect to  $E[AONR]$ . The labels in the y axis indicate the number of the trial in the original dataset.



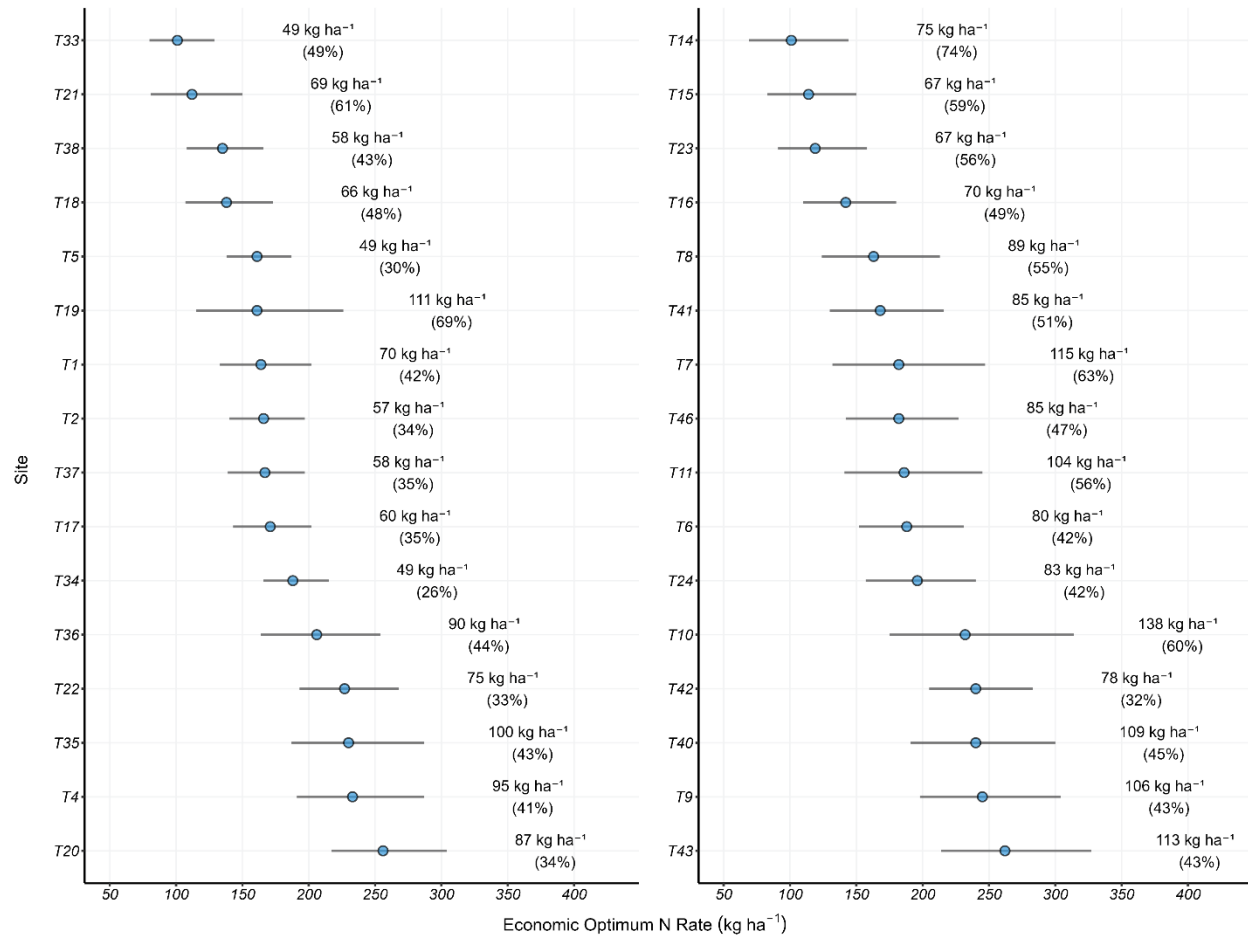

**Fig. S3.** Summary of the economic optimum nitrogen rate (EONR) for each of the selected sites. Circles indicate the expected value of the distribution ( $E[EONR]$ ), the horizontal bars and upper-level values on the right indicate the 95% credible interval of the EONR, and the lower-level values, between parentheses, on the right indicate the proportion of the uncertainty with respect to  $E[EONR]$ . The labels in the y axis indicate the number of the trial in the original dataset.

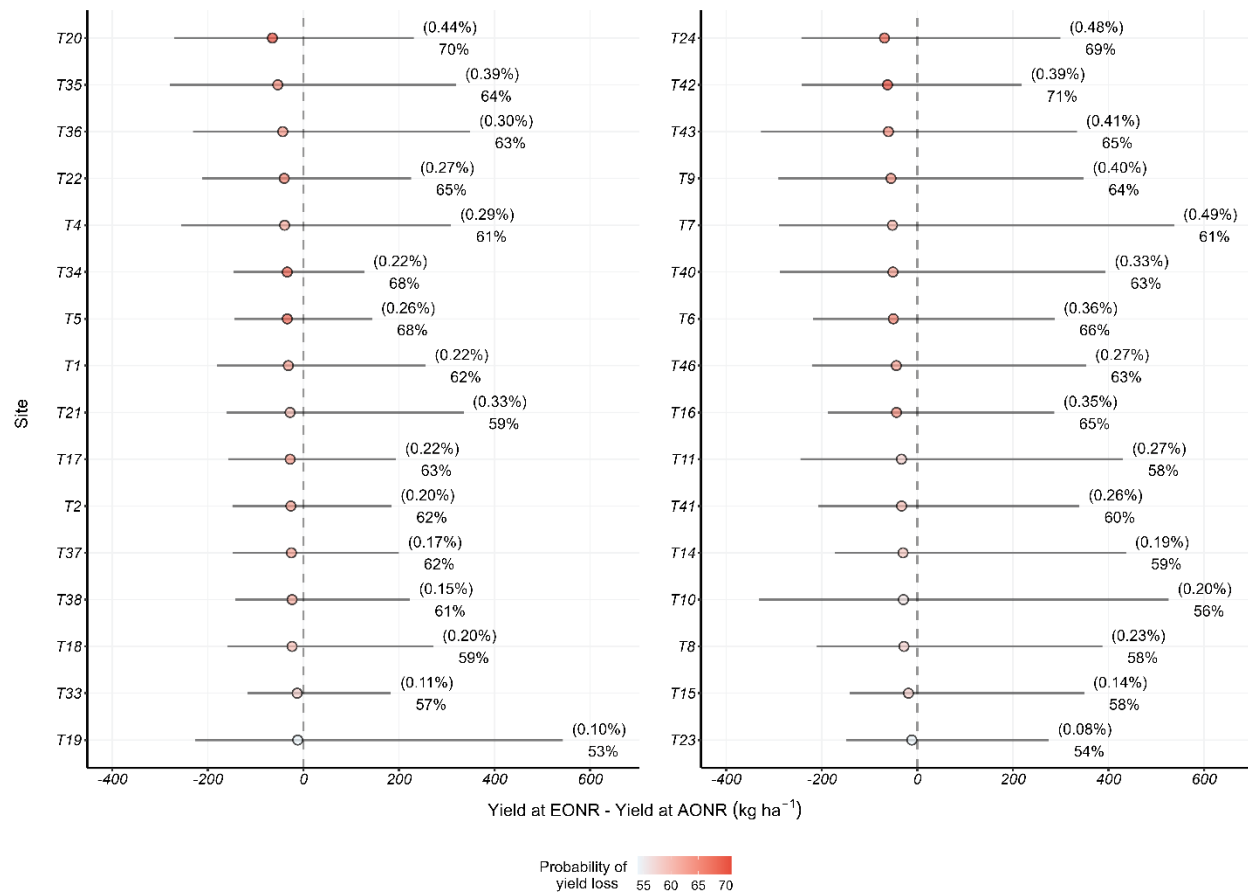

**Fig. S4.** Yield loss and its probability when reducing the nitrogen rate from the expected value of the agronomic optimum nitrogen rate probability distribution (E[AONR]) to expected value of the economic optimum nitrogen rate probability distribution (E[EONR]). This corresponds to Phase I of nitrogen reductions. Circles indicate the expected yield loss, the horizontal bars and indicate the 95% credible interval of the yield loss estimation. The upper-level values, between parentheses, on the right indicate the proportion of yield loss with respect to E[AONR] and the lower-level values on the right and circle colors indicate the probability associated to each yield loss estimation. The labels in the y axis indicate the number of the trial in the original dataset.

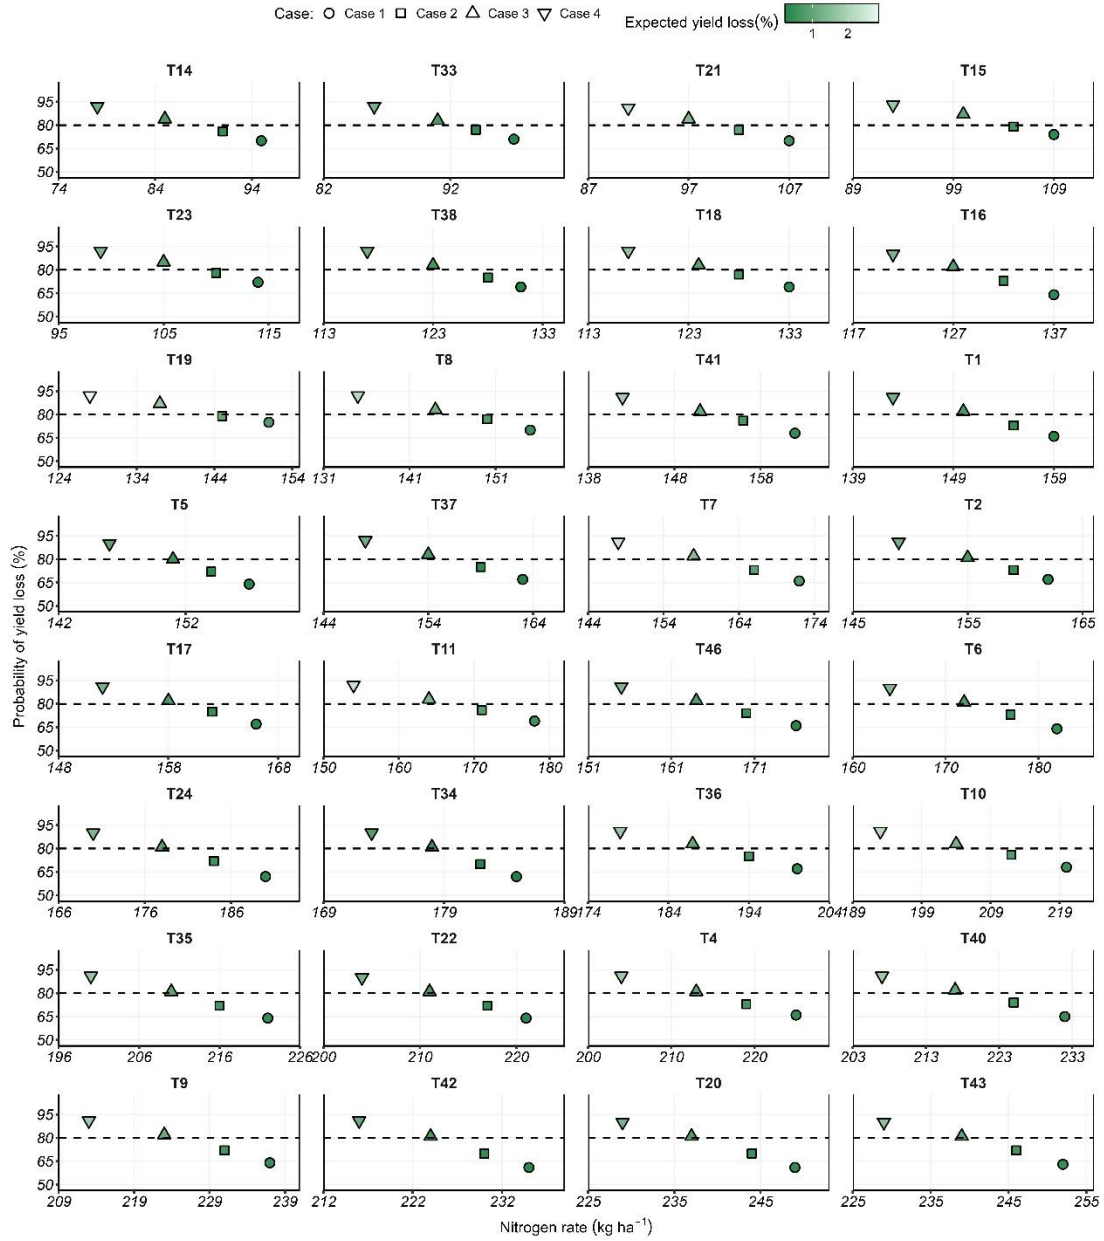

**Fig. S5.** Probability of yield loss and expected yield loss with respect to yield at the economic optimum nitrogen rate (EONR) (Phase II) in a given quadratic plateau model within each site for each case of nitrogen fertilization reduction. Cases 1, 2, 3, and 4 represent the 0.4, 0.3, 0.2, and 0.1 quantiles of the EONR probability distribution, respectively. The label in each plot indicates the number of the trial in the original dataset.

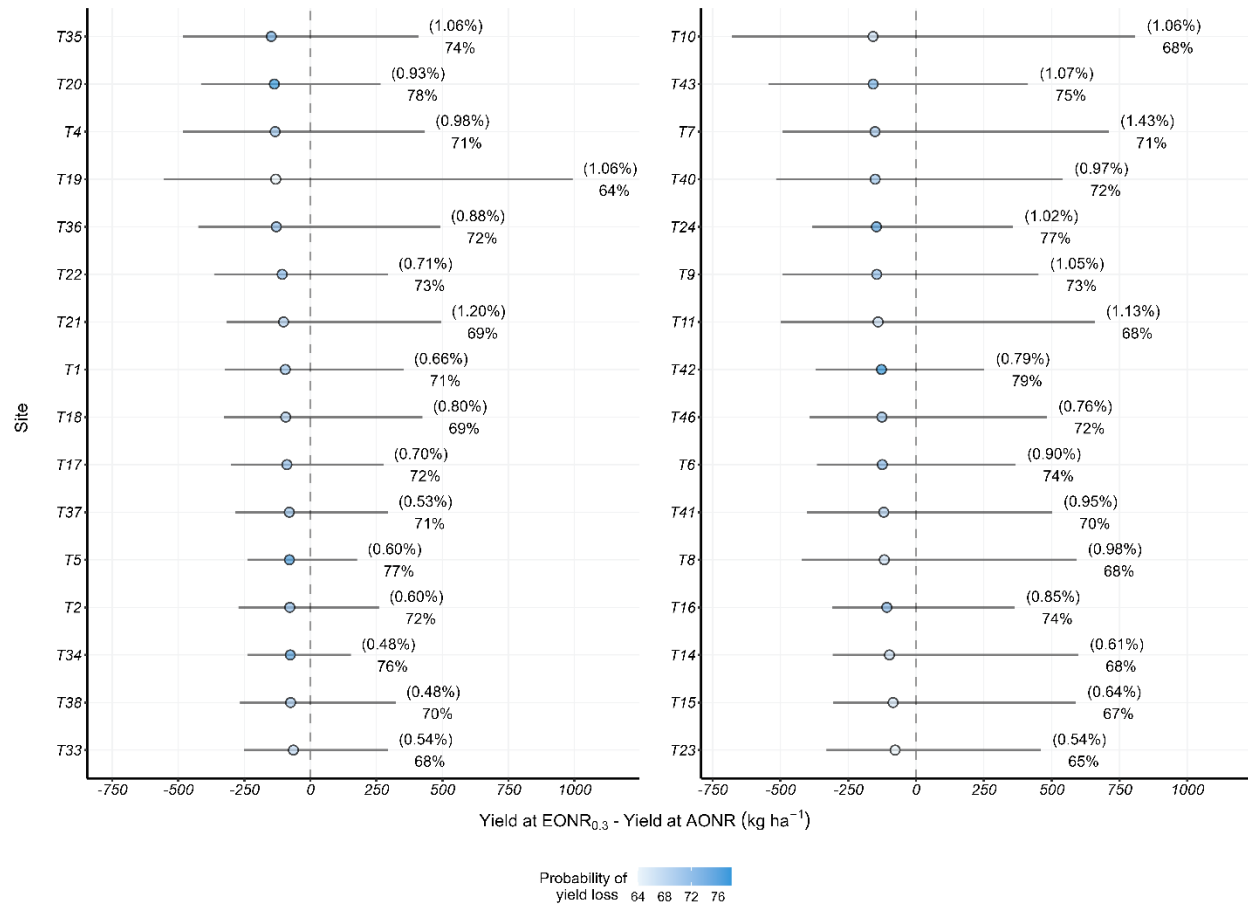

**Fig. S6.** Yield loss and its probability when reducing the nitrogen rate from the expected value of the agronomic optimum nitrogen rate probability distribution ( $E[AONR]$ ) to the 0.3 quantile of the economic optimum nitrogen rate probability distribution ( $EONR_{0.3}$ ). This corresponds to the total nitrogen fertilization reductions Phases I and II. Circles indicate the expected yield loss, the horizontal bars indicate the 95% credible interval of the yield loss estimation. The upper-level values, between parentheses, on the right indicate the proportion of yield loss with respect to  $E[AONR]$  and the lower-level values on the right and circle colors indicate the probability associated to each yield loss estimation. The labels in the y axis indicate the number of the trial in the original dataset.

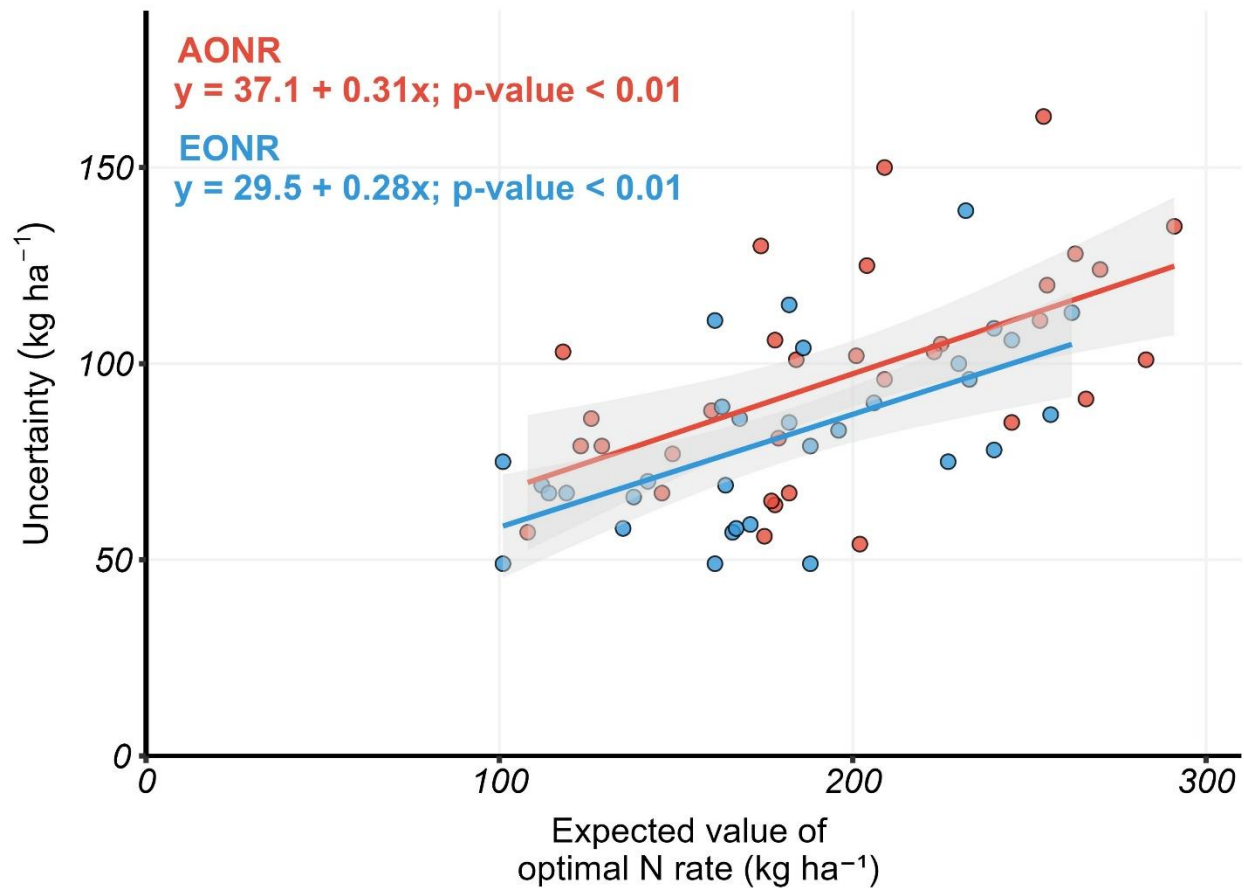

79 **Fig. S7.** Relationship between the expected value of the optimal nitrogen rates (AONR and  
 80 EONR) and their associated uncertainties. Solid line is the least square estimation of the  
 81 regression between the dependent (y) and independent (x) variables in this plot. Shadow area  
 82 represents the 95% confidence interval of the regression line. P-values < 0.01 indicate that the  
 83 slopes were different from zero for  $\alpha = 0.01$ .

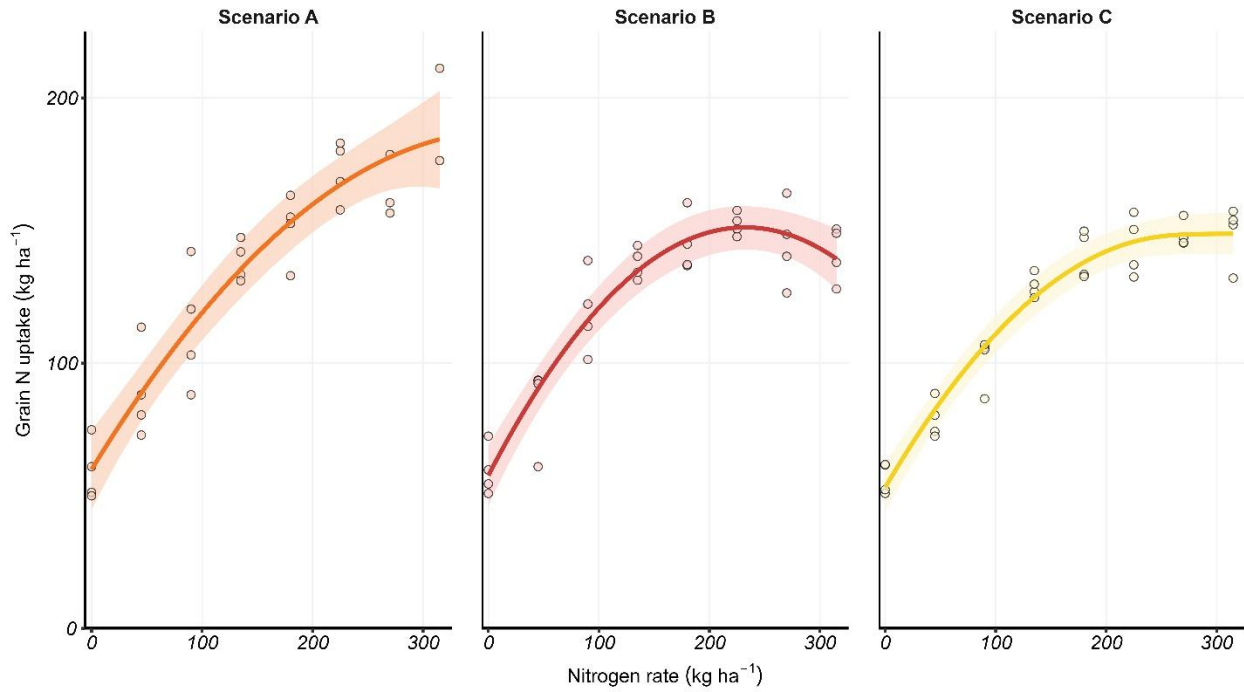

**Fig. S8.** Relationship between grain nitrogen uptake ( $y$ ) and nitrogen rate ( $x$ ) in each of the selected scenarios. The solid lines represent the expected nitrogen uptake at different nitrogen rates. The shadow areas indicate the 95% credible interval of the posterior predictive distributions.

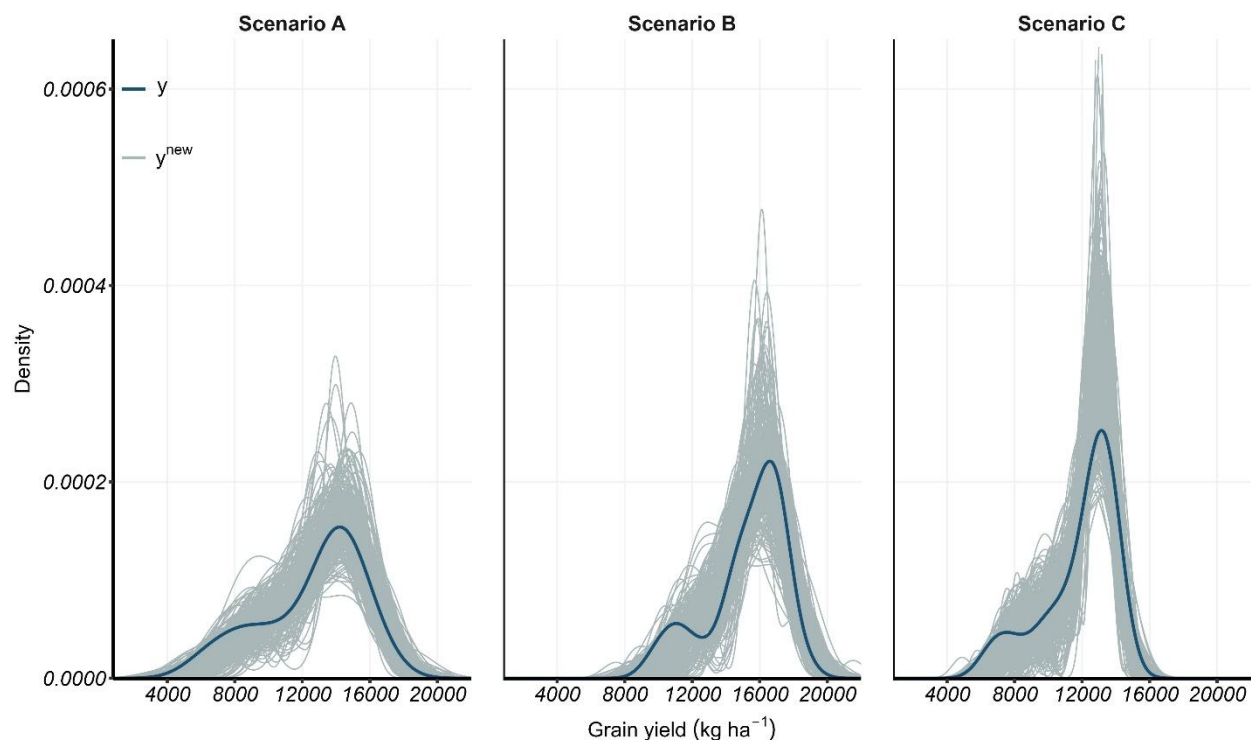

**Fig. S9.** Posterior predictive distributions for the models fitted to the maize grain yield versus nitrogen rate relationship in each of the selected scenarios. The blue lines are the distribution of the observed values of grain yield. The gray lines are two hundred curves representing the distribution of 32 observations (total number of observations in each scenario) randomly sampled from the posterior predictive distributions for grain yield.

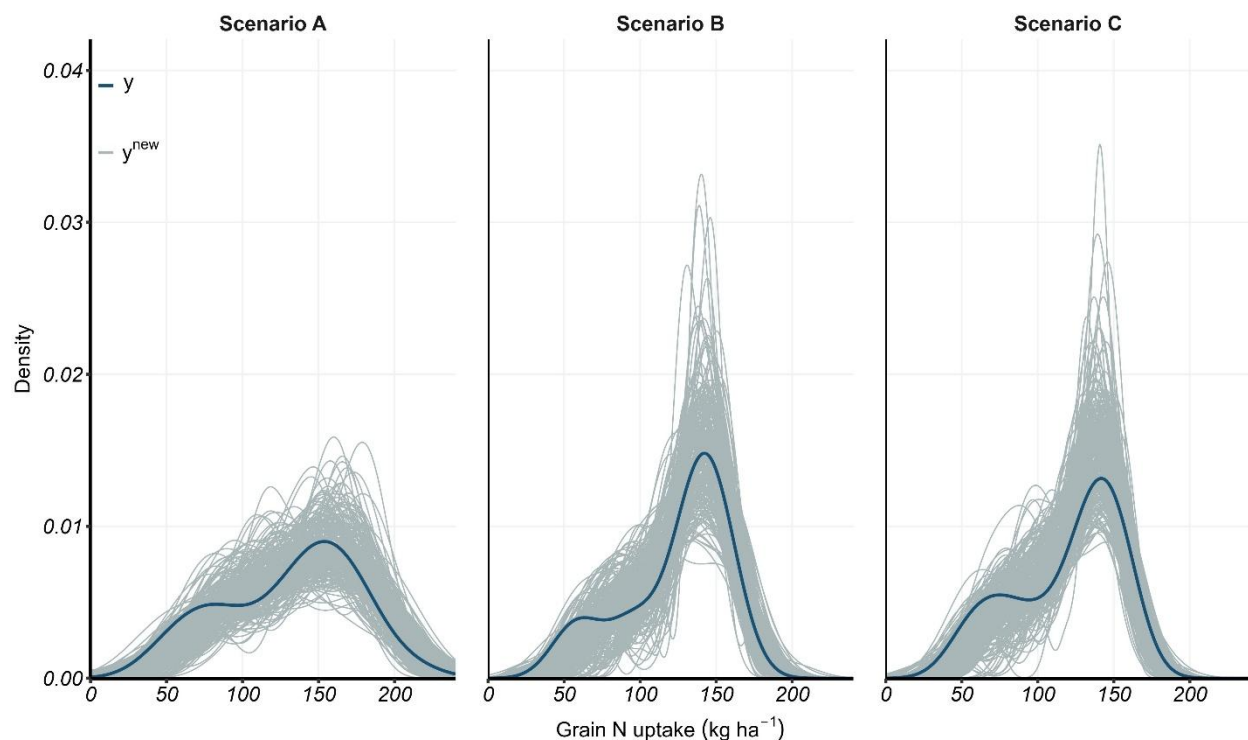

**Fig. S10.** Posterior predictive distributions for the models fitted to the grain nitrogen uptake versus nitrogen rate relationship in each of the selected scenarios. The blue lines are the distribution of the observed values of grain nitrogen uptake. The gray lines are two hundred curves representing the distribution of 32 observations (total number of observations in each scenario) randomly sampled from the posterior predictive distributions for grain nitrogen uptake.



### References Table S3

1. Adviento-Borbe, M. a. A., Haddix, M. L., Binder, D. L., Walters, D. T. & Dobermann, A. Soil greenhouse gas fluxes and global warming potential in four high-yielding maize systems. *Global Change Biology* **13**, 1972–1988 (2007).
2. Fujinuma, R., Venterea, R. T. & Rosen, C. Broadcast Urea Reduces N<sub>2</sub>O but Increases NO Emissions Compared with Conventional and Shallow-Applied Anhydrous Ammonia in a Coarse-Textured Soil. *Journal of Environmental Quality* **40**, 1806–1815 (2011).
3. Maharjan, B. & Venterea, R. T. Nitrite intensity explains N management effects on N<sub>2</sub>O emissions in maize. *Soil Biology and Biochemistry* **66**, 229–238 (2013).
4. Maharjan, B., Venterea, R. T. & Rosen, C. Fertilizer and Irrigation Management Effects on Nitrous Oxide Emissions and Nitrate Leaching. *Agronomy Journal* **106**, 703–714 (2014).
5. Parkin, T. B. & Hatfield, J. L. Influence of nitrapyrin on N<sub>2</sub>O losses from soil receiving fall-applied anhydrous ammonia. *Agriculture, Ecosystems & Environment* **136**, 81–86 (2010).
6. Phillips, R. L., Tanaka, D. L., Archer, D. W. & Hanson, J. D. Fertilizer Application Timing Influences Greenhouse Gas Fluxes Over a Growing Season. *Journal of Environmental Quality* **38**, 1569–1579 (2009).
7. Smith, D. R., Hernandez-Ramirez, G., Armstrong, S. D., Bucholtz, D. L. & Stott, D. E. Fertilizer and Tillage Management Impacts on Non-Carbon-Dioxide Greenhouse Gas Emissions. *Soil Science Society of America Journal* **75**, 1070–1082 (2011).
8. Venterea, R. T., Dolan, M. S. & Ochsner, T. E. Urea Decreases Nitrous Oxide Emissions Compared with Anhydrous Ammonia in a Minnesota Corn Cropping System. *Soil Science Society of America Journal* **74**, 407–418 (2010).
9. Hernandez-Ramirez, G., Brouder, S. M., Smith, D. R. & Van Scoyoc, G. E. Greenhouse Gas Fluxes in an Eastern Corn Belt Soil: Weather, Nitrogen Source, and Rotation. *Journal of Environmental Quality* **38**, 841–854 (2009).
10. Johnson, J. M. F., Archer, D. & Barbour, N. Greenhouse Gas Emission from Contrasting Management Scenarios in the Northern Corn Belt. *Soil Science Society of America Journal* **74**, 396–406 (2010).
11. Mitchell, D. C., Castellano, M. J., Sawyer, J. E. & Pantoja, J. Cover Crop Effects on Nitrous Oxide Emissions: Role of Mineralizable Carbon. *Soil Science Society of America Journal* **77**, 1765–1773 (2013).
12. Omonode, R. A. & Vyn, T. J. Nitrification Kinetics and Nitrous Oxide Emissions when Nitrapyrin is Coapplied with Urea–Ammonium Nitrate. *Agronomy Journal* **105**, 1475–1486 (2013).

13. Johnson, F. E., Roth, R. T., Ruffatti, M. D. & Armstrong, S. D. Cover crop impacts on nitrogen losses and environmental damage cost. *Agriculture, Ecosystems & Environment* **363**, 108859 (2024).
14. Preza-Fontes, G., Christianson, L. E., Greer, K., Bhattarai, R. & Pittelkow, C. M. In-season split nitrogen application and cover cropping effects on nitrous oxide emissions in rainfed maize. *Agriculture, Ecosystems & Environment* **326**, 107813 (2022).
15. Bakhsh, A., Kanwar, R. S., Pederson, C. & Bailey, T. B. N-Source Effects on Temporal Distribution of NO<sub>3</sub>-N Leaching Losses to Subsurface Drainage Water. *Water Air Soil Pollut* **181**, 35–50 (2007).
16. Bakhsh, A., Kanwar, R. S. & Baker, J. L. N-Application Methods and Precipitation Pattern Effects on Subsurface Drainage Nitrate Losses and Crop Yields. *Water Air Soil Pollut* **212**, 65–76 (2010).
17. Helmers, M. J., Zhou, X., Baker, J. L., Melvin, S. W. & Lemke, D. W. Nitrogen loss on tile-drained Mollisols as affected by nitrogen application rate under continuous corn and corn-soybean rotation systems. *Can. J. Soil. Sci.* **92**, 493–499 (2012).
18. Jaynes, D. B. Nitrate loss in subsurface drainage and corn yield as affected by timing of sidedress nitrogen. *Agricultural Water Management* **130**, 52–60 (2013).
19. Jaynes, D. b., Colvin, T. s., Karlen, D. I., Cambardella, C. a. & Meek, D. w. Nitrate Loss in Subsurface Drainage as Affected by Nitrogen Fertilizer Rate. *Journal of Environmental Quality* **30**, 1305–1314 (2001).
20. Kucharik, C. J. & Brye, K. R. Integrated Biosphere Simulator (IBIS) Yield and Nitrate Loss Predictions for Wisconsin Maize Receiving Varied Amounts of Nitrogen Fertilizer. *Journal of Environmental Quality* **32**, 247–268 (2003).
21. Prunty, L. & Greenland, R. Nitrate leaching using two potato-corn N-fertilizer plans on sandy soil. *Agriculture, Ecosystems & Environment* **65**, 1–13 (1997).
22. Randall, G. W., Vetsch, J. A. & Huffman, J. R. Nitrate Losses in Subsurface Drainage from a Corn–Soybean Rotation as Affected by Time of Nitrogen Application and Use of Nitrpyrin. *Journal of Environmental Quality* **32**, 1764–1772 (2003).
23. Randall, G. W. & Vetsch, J. A. Nitrate Losses in Subsurface Drainage from a Corn–Soybean Rotation as Affected by Fall and Spring Application of Nitrogen and Nitrpyrin. *Journal of Environmental Quality* **34**, 590–597 (2005).
24. Sexton, B. T., Moncrief, J. F., Rosen, C. J., Gupta, S. C. & Cheng, H. H. Optimizing Nitrogen and Irrigation Inputs for Corn Based on Nitrate Leaching and Yield on a Coarse-Textured Soil. *Journal of Environmental Quality* **25**, 982–992 (1996).

- 168 25. Walters, D. T. & Malzer, G. L. Nitrogen Management and Nitrification Inhibitor Effects on  
169 Nitrogen-15 Urea: II. Nitrogen Leaching and Balance. *Soil Science Society of America Journal*  
170 **54**, 122–130 (1990).
- 171 26. Kalita, P. K., Algoazany, A. S., Mitchell, J. K., Cooke, R. A. C. & Hirschi, M. C. Subsurface  
172 water quality from a flat tile-drained watershed in Illinois, USA. *Agriculture, Ecosystems &*  
173 *Environment* **115**, 183–193 (2006).
- 174 27. O'Brien, P. L. *et al.* Nitrate losses and nitrous oxide emissions under contrasting tillage and  
175 cover crop management. *Journal of Environmental Quality* **51**, 683–695 (2022).
- 176 28. Gentry, L. E. *et al.* Split fertilizer nitrogen application with a cereal rye cover crop reduces tile  
177 nitrate loads in a corn–soybean rotation. *Journal of Environmental Quality* **53**, 90–100 (2024).
- 178
